# Supplementary material
Source: ML conference proceedings conference paper supplement (https://proceedings.neurips.cc/paper_files/paper/2011/hash/192fc044e74dffea144f9ac5dc9f3395-Abstract.html)
Supplement: Supplementary file [file 192fc044e74dffea144f9ac5dc9f3395-Supplemental.zip]

---

# Supplementary Material for Sparse Filtering

---

Jiquan Ngiam, Pang Wei Koh, Zhenghao Chen, Sonia Bhaskar, Andrew Y. Ng  
Computer Science Department, Stanford University  
{jngiam, pangwei, zhenghao, sbhaskar, ang}@cs.stanford.edu

## 1 Matlab Implementation of Sparse Filtering

---

### Algorithm 1 Sparse Filtering Matlab Implementation

---

```
function [optW] = SparseFiltering(N, X);
    % N = # features to learn, X = input data (examples in column)
    % You should pre-process X by removing the DC component per example,
    % before calling this function.
    % e.g., X = bsxfun(@minus, X, mean(X));
    addpath minFunc/ % Add path to minFunc optimization package
    optW = randn(N, size(X, 1));
    optW = minFunc(@SparseFilteringObj, optW(:), struct('MaxIter', 100), ...
        X, N);
    optW = reshape(optW, [N, size(X, 1)]);
end

function [Obj, DeltaW] = SparseFilteringObj (W, X, N)
    % Reshape W into matrix form
    W = reshape(W, [N, size(X,1)]);

    % Feed Forward
    F = W*X; % Linear Activation
    Fs = sqrt(F.^2 + 1e-8); % Soft-Absolute Activation
    [NFs, L2Fs] = l2row(Fs); % Normalize by Rows
    [Fhat, L2Fn] = l2row(NFs'); % Normalize by Columns

    % Compute Objective Function
    Obj = sum(sum(Fhat, 2), 1);

    % Backprop through each feedforward step
    DeltaW = l2grad(NFs', Fhat, L2Fn, ones(size(Fhat)));
    DeltaW = l2grad(Fs, NFs, L2Fs, DeltaW');
    DeltaW = (DeltaW .* (F ./ Fs)) * X';

    DeltaW = DeltaW(:);
end

function [Y,N] = l2row(X) % L2 Normalize X by rows
    % We also use this to normalize by column with l2row(X')
    N = sqrt(sum(X.^2, 2) + 1e-8);
    Y = bsxfun(@rdivide, X, N);
end

function [G] = l2grad(X,Y,N,D) % Backpropagate through Normalization
    G = bsxfun(@rdivide, D, N) - bsxfun(@times, Y, sum(D.*X, 2) ./ (N.^2));
end
```

---
